# Supplementary material for: Effect Sizes of Cognitive and Locomotive Behavior Tests in the 5XFAD-J Mouse Model of Alzheimer’s Disease
Source: MDPI journal article supplement (doi:10.3390/ijms242015064), 2023-10-11
Supplement: s1 [file s1]

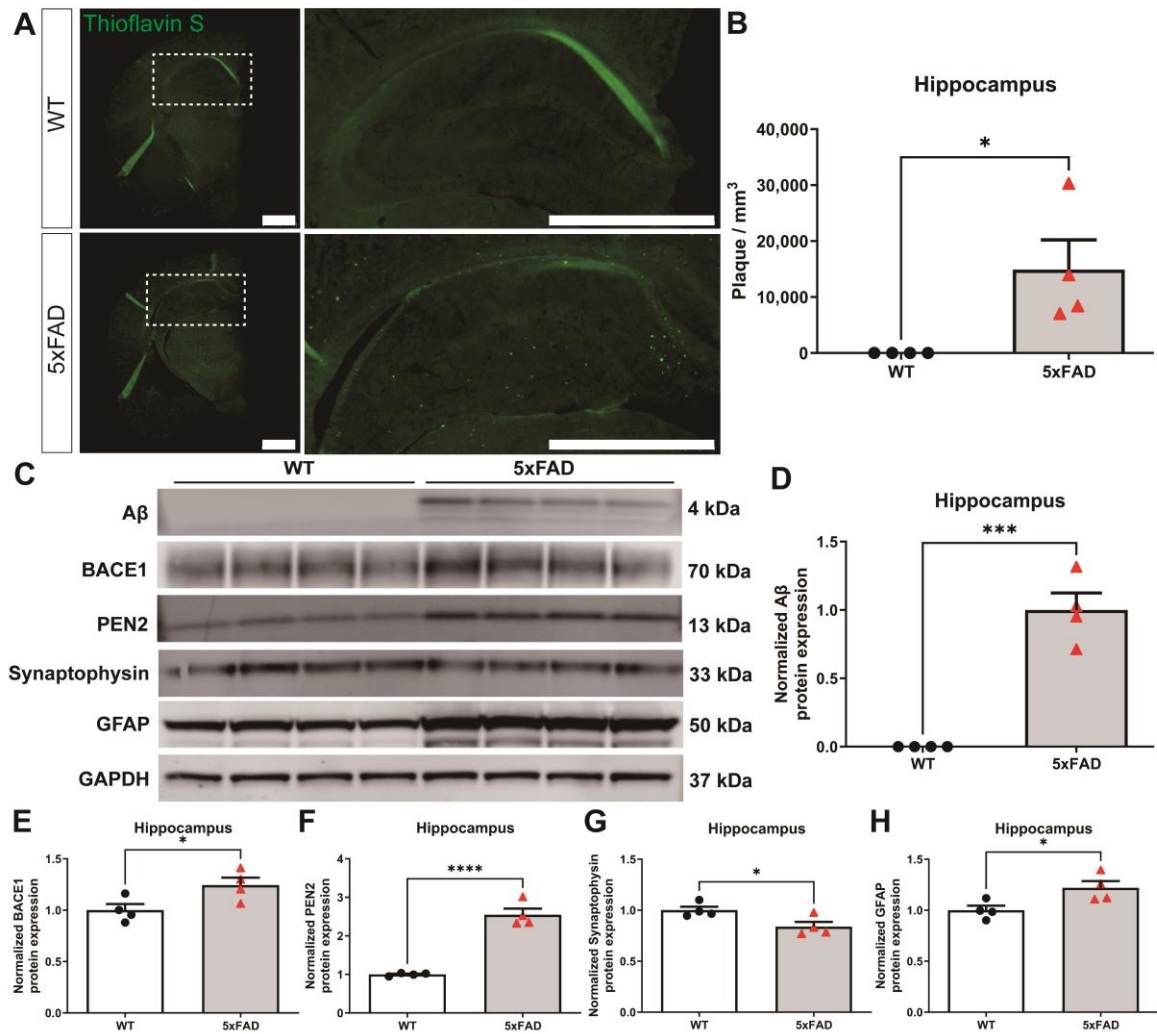

Figure S1. Pathological analysis in 6-month-old 5XFAD mice. (A) Representative images of thioflavin-S staining of the hippocampus. Scale bars = 1 mm. (B) Bar graph of amyloid plaque numbers in the hippocampus. n = 4 per group. (C) Representative western blot images of hippocampal proteins. (D-H) Bar graph of protein expression in the hippocampus. n = 4 per group. \* p < 0.05, \*\*\* p < 0.001, \*\*\*\* p < 0.0001, (t-test). Data are presented as mean ± standard error of the mean. WT, wildtype; Aβ, amyloid β peptide; BACE1, β-secretase 1; PEN2, presenilin enhancer 2; GFAP, glial fibrillary acidic protein; GAPDH, Glyceraldehyde 3-phosphate dehydrogenase; kDa, kilodalton

Table S1. Effect size and sample size of WT vs. 5XFAD mice in the pathological analysis.

| Genotype<br>WT/5XFAD<br>(n) | Molecular     | Analysis                                | 6-month-old     |         |                               |                       |             |
|-----------------------------|---------------|-----------------------------------------|-----------------|---------|-------------------------------|-----------------------|-------------|
|                             |               |                                         | WT Mean (SD)    | P value | Effect<br>size<br>(Cohen's d) | Sample size per group |             |
|                             |               |                                         | 5XFAD Mean (SD) |         |                               | (1-β) = 0.8           | (1-β) = 0.9 |
| 4/4                         | Thioflavin-S  | Number of<br>plaque (/mm <sup>2</sup> ) | 0 (0.00)        | 0.032   | 1.97                          | 6                     | 7           |
|                             |               |                                         | 14,868 (10,675) |         |                               |                       |             |
| 4/4                         | Aβ            | Protein<br>expression                   | 0 (0.00)        | <0.001  | -5.70                         | ≤3*                   | 3           |
|                             |               |                                         | 1 (0.25)        |         |                               |                       |             |
| 4/4                         | BACE1         | Protein<br>expression                   | 1.00 (0.12)     | 0.042   | -1.82                         | 6                     | 8           |
|                             |               |                                         | 1.24 (0.15)     |         |                               |                       |             |
| 4/4                         | PEN2          | Protein<br>expression                   | 1.00 (0.04)     | <0.0001 | -6.81                         | ≤3*                   | ≤3*         |
|                             |               |                                         | 2.55 (0.32)     |         |                               |                       |             |
| 4/4                         | Synaptophysin | Protein<br>expression                   | 1.00 (0.07)     | 0.033   | 1.94                          | 6                     | 7           |
|                             |               |                                         | 0.84 (0.09)     |         |                               |                       |             |
| 4/4                         | GFAP          | Protein<br>expression                   | 1.00 (0.09)     | 0.035   | -1.91                         | 6                     | 7           |
|                             |               |                                         | 1.22 (0.14)     |         |                               |                       |             |

\*: Sample size is less than 3; The number of subjects was three to ensure minimal statistical significance. Aβ, Amyloid β peptide; BACE1, β-secretase 1; PEN2, presenilin enhancer 2; GFAP, Glial fibrillary acidic protein

## Supplementary Materials and Methods

### 1. Sampling

Anesthesia was induced in mice via intraperitoneal injection of 2,2,2-tribromoethanol (150 mg/kg, Avertin, Sigma, St. Louis, MO, USA). Serial perfusion was performed using 1× phosphate-buffered saline (PBS, pH 7.2) for 5 minutes. Brain tissue samples were then collected from the mice followed by fixation of the brain with 4% paraformaldehyde for Thioflavin S staining.

### 2. Thioflavin S staining

To assess amyloid plaques, brain tissues were subjected to Thioflavin S staining. Briefly, brain sections were washed 3 times with 1× PBS and subsequently incubated with a 1% Thioflavin S solution (50% ethanol in 1× PBS) for 8 minutes at 24°C. The stained samples were then rinsed twice with 85% ethanol for 5 minutes, followed by a 5-minute wash in 95% ethanol and a triple wash in 1× PBS. The stained brain tissue samples were imaged using Panoramic Slide Scan, and amyloid plaque quantification was conducted using Stereo Investigator (MBF Bioscience, VT, USA).

### 3. Western blot

For protein expression analysis, hippocampal tissues were homogenized utilizing RIPA solution supplemented with a protease and phosphatase inhibitor cocktail. Protein samples extracted from the hippocampus tissues were quantified using the BCA method. Equal quantities (20 µg) of the protein samples were loaded, mixed with 4× protein sample buffer, and subjected to electrophoresis on pre-cast 4%–12% polyacrylamide gels using an Invitrogen western blot system (Invitrogen, MA, USA) at 150 V for 40 minutes. Subsequently, the separated proteins were transferred onto polyvinylidene fluoride (catalog no. LC2002, Novex, Hochdorf, Switzerland) or nitrocellulose (catalog no. LC2000, Novex) membranes at 20 V for 2 hours. Primary antibodies, including those against BACE1 (rabbit, 1:1,000, # 5606, Cell Signaling Technology), PEN2 (rabbit, 1:1,000, # 8598, Cell Signaling Technology), Aβ (6E10) (mouse, 1:2,000, # 803001, BioLegend, CA, USA), synaptophysin (rabbit, 1:1,000, # SAB 450-2906, Sigma, MO, USA), and GFAP (rabbit, 1:2,000, # Z0334, Dako, Glostrup, Denmark), were incubated with the membranes overnight at 4°C. Following membrane washing using Tris-buffered saline with 0.3% Tween 20 Detergent (TBS-T), secondary antibodies including IRD-800 anti-rabbit (donkey, 1:2,000, # 926-32213, LI-COR, NE, USA) and IRD-800 anti-mouse (donkey, 1:5,000, # 926-32212, LI-COR) were applied to the membranes for 2 hours at 24°C. After subsequent membrane washing 3 times with 1× PBS, fluorescence signals were detected and analyzed using Odyssey-CLx (LI-COR, NE, USA).
